# Supplementary material for: Improved RNA modification mapping of cellular non-coding RNAs using C- and U-specific RNases
Source: Royal Society of Chemistry journal article supplement (doi:10.1039/c9an02111f), 2019-12-02
Supplement: c9an02111f1.xlsx [file c9an02111f1.xlsx]

## Sheet: 23S-T1
T1 digestion product	Column1	mass	Column2	MSMS	MS1 only	Column3	Mass4	Unique digestion products	Column5	nt	MSMS6	MS1 only7
ACACACUAUCAUUAACUGp		5721.75	isomer 1				5135.68	UUUAUUAAAAACACAGp		16
AAAUACCACCCUUUAAUGp							5118.65	U7AACCUUUACUAUAGp		16				Digestion products (DPs)detected at each MS stage is shown as shaded
UUUAUUAAAAACACAGp		5135.68					4404.56	CUCAUCACAUCCUGp		14
U7AACCUUUACUAUAGp		5118.65					4170.57	UAACAUCAAAUCGp		13
CUCAUCACAUCCUGp		4404.56					4147.54	CCAUCAUUUAAAGp		13
UAACAUCAAAUCGp		4170.57					4123.53	CUAAAUACUCCUGp		13
CCAUCAUUUAAAGp		4147.54					4099.52	UCUCCUCCUAAAGp		13
CUAAAUACUCCUGp		4123.53					3888.55	UACACAAAAAUGp		12
ACCAUCCUCCAAGp		4121.56	isomer 2				3841.52	UAACACUAACUGp		12
ACUUACCAACCCGp							3839.55	CCAAUCAAACCGp		12
UCUCCUCCUAAAGp		4099.52					3815.54	UACCCCAAACCGp		12
UACACAAAAAUGp		3888.55					3793.49	AACUCAUCUCCGp		12
UAACACUAACUGp		3841.52					3559.5	AAACAUCUAAGp		11
CCAAUCAAACCGp		3839.55					3557.53	AAACAACCCAGp		11
UACCCCAAACCGp		3815.54					3550.49	PAAC]APAACGp		11
ACUUAUAUUCUGp		3796.45	isomer 3				3252.43	ACUAAUKPTGp		10
UUAAUAUUCCUGp							3229.47	AAAUCAACCGp		10
AACUCAUCUCCGp		3793.49					3207.42	CCAUUUAAAGp		10
AAACAUCUAAGp		3559.5					3206.44	CUAAACCAUGp		10
AAACAACCCAGp		3557.53					3198.41	AAATUCCUUGp		10
PAAC]APAACGp		3550.49					3158.42	AUUCCCCCAGp		10
ACUAAUKPTGp		3252.43					3136.37	UCCCUAUCUGp		10
AAAUCAACCGp		3229.47					3134.41	UCUCCACCCGp		10
CCAUUUAAAGp		3207.42					2949.42	AAAAAUUAGp		9
CUAAACCAUGp		3206.44					2948.44	AAAAUCAAGp		9
AAATUCCUUGp		3198.41					2901.4	AAUCCAUAGp		9
AUUCCCCCAGp		3158.42					2878.37	UUAUAACCGp		9
UCCCUAUCUGp		3136.37					2876.4	ACCCCUAAGp		9
UCUCCACCCGp		3134.41					2854.36	CUAAUCCUGp		9
AAAAAUUAGp		2949.42					2832.32	UACCUUUUGp		9
AAAAUCAAGp		2948.44					2807.32	UUCUCCCUGp		9
CAACAAAUGp		2924.43	isomer 4				2806.34	UUCUCCCCGp		9
AAUACCAAGp							2735.37	CUUAACCUU		9
AAUCCAUAGp		2901.4					2573.33	UACUAAUGp		9
UUAUAACCGp		2878.37					2572.35	CAUCUAAGp		9
ACCCCUAAGp		2876.4					2553.35	CCULCCCGp		9
UCUUAACUGp		2855.34	isomer 5				2550.3	CUAUUUAGp		9
UUCAUAUCGp							2526.29	UUUUCCAGp		8
CUAAUCCUGp		2854.36					2525.31	ACUCCUUGp		8
UACCUUUUGp		2832.32					2524.32	UCAUCCCGp		8
UUCUCCCUGp		2807.32					2314.34	AUAAAAGp		7
UUCUCCCCGp		2806.34					2292.35	ADAACAGp		7
CUUAACCUU		2735.37					2245.26	UUAAUUGp		7
AAACCCAGp		2594.39	isomer 6				2244.28	UUAAUCGp		7
CAAACACGp							2241.32	AACCCCGp		7
UACUAAUGp		2573.33					2232.31	CABCUCGp		7
CAUCUAAGp		2572.35					2218.3	UACCCCGp		7
UCCCAAAGp		2571.36	isomer 7				2008.32	AAAAAGp		6
CAAAUCCGp							1985.29	AUAAAGp		6
CCULCCCGp		2553.35					1984.31	AAACAGp		6
CUAUUUAGp		2550.3					1974.31	ACAC=Gp		6
CUAAUCUGp		2549.32	isomer 8				1936.28	CCCAAGp		6
UUAUCACGp							1914.24	ACCUUGp		6
UAACUUCGp							1912.27	ACCCCGp		6
UUCUAACGp							1655.26	AAACGp		5
CCUCUAAGp		2548.33	isomer 9				1650.23	AC?UGp		5
CAUCACUGp							1610.18	UUUAGp		5
UUUUCCAGp		2526.29								527
ACUCCUUGp		2525.31							Sequence coverage	18.1474
UCAUCCCGp		2524.32											Mapped
AUAAAAGp		2314.34											not mapped
ADAACAGp		2292.35
ACAUAAGp		2290.33	isomer 10
CAAAAUGp
AAAUCAGp
UAUAAUGp		2268.29	isomer 11
AACAUUGp
CUAAAUGp
AAACUUGp
CAAACUGp		2266.32	isomer 12
AAUACCGp
AUACCAGp
ACAUCAGp
AAACCCGp		2265.34	isomer 13
ACACACGp
UUAAUUGp		2245.26
UUAAUCGp		2244.28
UUAACCGp		2243.29	isomer 14
UCCUAAGp
UAAUCCGp
UCCAACGp		2242.31	isomer 15
CACUACGp
CUCAACGp
UCCCAAGp
CUAACCGp
AACCCCGp		2241.32
CABCUCGp		2232.31
AUUUCCGp		2220.27	isomer 16
UAUCCUGp
CUCACUGp		2219.28	isomer 17
CUUCCAGp
UACUCCGp
CUCCUAGp
UACCCCGp		2218.3
AAAAAGp		2008.32
AUAAAGp		1985.29
AAACAGp		1984.31
ACAC=Gp		1974.31
AAUAUGp		1962.26	isomer 18
UAAUAGp
AAAUUGp
ACUAAGp		1961.28	isomer 19
AAUCAGp
AUACAGp
UACAAGp
AACUAGp
UAAACGp
CAUAAGp
AACCAGp		1960.3	isomer 20
AAACCGp
AAACCGp	identical
ACCAAGp
UUAAUGp		1939.24	isomer 21
UUUAAGp
AUCUAGp		1938.25	isomer 22
UAUCAGp
UAUACGp
UCAUAGp
UACACGp		1937.27	isomer 23
CACAUGp
AACCUGp
CUAACGp
CAUCAGp
AACUCGp
CAACUGp
ACUCAGp
AACUCGp	identical
ACACUGp
AUACCGp
CCAAUGp
CCCAAGp		1936.28
CUUAUGp		1915.22	isomer 24
UACUUGp
UUACUGp
ACCUUGp		1914.24
UACCCGp		1913.26	isomer 25
CCAUCGp
ACCCCGp		1912.27
UUCCUGp		1891.21	isomer 26
CUCUUGp
AAAAGp		1679.27
AAAAGp	identical
AAAAGp	identical
AAAAGp	identical
AUAAGp		1656.24	isomer 27
AAUAGp
AUAAGp	identical
AAACGp		1655.26
AC?UGp		1650.23
UUAAGp		1633.21	isomer 28
AUAUGp
UUAAGp	identical
UAUAGp
UUAAGp	identical
AUAUGp
UAAUGp
AACUGp		1632.23	isomer 29
CUAAGp
UAACGp	identical
UAACGp	identical
UAACGp	identical
CAAUGp
AACUGp
AACCGp	identical	1631.24	isomer 30
AACCGp	identical
ACACGp
AACCGp	identical
AACCGp	identical
UUUAGp		1610.18
CUUAGp		1609.2	isomer 31
ACUUGp	identical
UCAUGp	identical
CUUAGp
UACUGp
CUAUGp
ACUUGp	identical
UCAUGp	identical
UACCGp		1608.22	isomer 32
CCAUGp
CACUGp	identical
CACUGp	identical
AUCCGp
CACUGp
CCCAGp	identical	1607.23	isomer 33
ACCCGp
CCCAGp	identical
CACCGp
ACCCGp
UUUCGp	identical	1586.17	isomer 34
UUUCGp	identical
UUCUGp	identical
CUUUGp
UUCUGp	identical
UUCCGp	identical	1585.19
CCUUGp
UCCUGp
CCCUGp	identical	1584.2	isomer 35
CCUCGp	identical
UCCCGp
CCCUGp
CCCCGp	identical	1583.22	isomer 36
CCCCGp	identical
CCCCGp	identical

## Sheet: 23S-cusativin
23S_Cus DP	23S_Cus DP_mass_3'>P	MSMS	MS1 only	Column1	Unique digestion products	Mass_3'>P	nt	MSMS2	MS1 only3
UUGAUGUGUAGGAUAGGUGGGAGGC	8233.04				UUGAUGUGUAGGAUAGGUGGGAGGC	8233.04	25
GGAAGGUUAAUUGAUGGGGUUAGC	7872				GGAAGGUUAAUUGAUGGGGUUAGC	7872	24				Digestion products detected at each MS stage is shown as shaded
AGUGUGUGUGUUAGUGGAAGC	6868.85				AGUGUGUGUGUUAGUGGAAGC	6868.85	21
GAGGGGAGUGAAAAAGAACC	6637.95				GAGGGGAGUGAAAAAGAACC	6637.95	20
AGGUUGAAGGUUGGGUAAC	6240.8				AGGUUGAAGGUUGGGUAAC	6240.8	19
GUUGUUGGGUAGGGGAGC	5943.74				GUUGUUGGGUAGGGGAGC	5943.74	18
GGUAAGGUGAUAUGAACC	5878.78				GGUAAGGUGAUAUGAACC	5878.78	18
UAAU[m1G]Y[m5U]GAAAAAUUAGC	5836.78				UAAU[m1G]Y[m5U]GAAAAAUUAGC	5836.78	18
AUGGUUAAGUGGGAAAC	5573.73				AUGGUUAAGUGGGAAAC	5573.73	17
UGAUAUGUAGGUGAAGC	5550.71				UGAUAUGUAGGUGAAGC	5550.71	17
UUUAAUGUUUGAUGUUC	5387.59				UUUAAUGUUUGAUGUUC	5387.59	17
UGAAUAUGGGGGGACC	5259.69				UGAAUAUGGGGGGACC	5259.69	16
UGGUGGGUAGUUUGAC	5214.62				UGGUGGGUAGUUUGAC	5214.62	16
UUUUGUAUAAUGGGUC	5120.59				UUUUGUAUAAUGGGUC	5120.59	16
UGGGGGUGAAAGGCC	4969.66				UGGGGGUGAAAGGCC	4969.66	15
GGAAGAGAUAAGUGC	4961.69				GGAAGAGAUAAGUGC	4961.69	15
GAUGUGGGAAGGCCC	4929.66				GAUGUGGGAAGGCCC	4929.66	15
AUAGGUUAAUGAGGC	4899.64				AUAGGUUAAUGAGGC	4899.64	15
GUGAAGAGGGAAAC	4655.66				GUGAAGAGGGAAAC	4655.66	14
GAGGAAAAGAAAUC	4623.67				GAGGAAAAGAAAUC	4623.67	14
UGAAUGGAAGGGCC	4608.62				UGAAUGGAAGGGCC	4608.62	14
GAAUGGGGAAACCC	4591.64				GAAUGGGGAAACCC	4591.64	14
AGGUAGAGAAUACC	4576.63				AGGUAGAGAAUACC	4576.63	14
UUUGAAGUGUGGAC	4547.56				UUUGAAGUGUGGAC	4547.56	14
AUUUAAAGUGGUAC	4515.57				AUUUAAAGUGGUAC	4515.57	14
UGUUUAUUAAAAAC	4460.55				UGUUUAUUAAAAAC	4460.55	14
GUGAGGGAAAGGC	4342.6				GUGAGGGAAAGGC	4342.6	13
GAAUAGGGGAGCC	4302.6				GAAUAGGGGAGCC	4302.6	13
AGGAGGUUAGUGC	4280.55				AGGAGGUUAGUGC	4280.55	13
GGAUAAAAGGUAC	4271.59				GGAUAAAAGGUAC	4271.59	13
GGGUGAAAAGCCC	4262.59				GGGUGAAAAGCCC	4262.59	13
UGUGAAGGUGUAC	4241.53				UGUGAAGGUGUAC	4241.53	13
AGUGAAAUUGAAC	4232.57				AGUGAAAUUGAAC	4232.57	13
GGAGAAUGUUAUC	4225.54				GGAGAAUGUUAUC	4225.54	13
AGGGUAUAGACCC	4223.57				AGGGUAUAGACCC	4223.57	13
AUUUAAAGAAAGC	4216.57				AUUUAAAGAAAGC	4216.57	13
UGAAGUAGGUCCC	4200.54				UGAAGUAGGUCCC	4200.54	13
AGGUUAAUAUUCC	4146.51				AGGUUAAUAUUCC	4146.51	13
GGGUGAAGGAAC	3997.56				GGGUGAAGGAAC	3997.56	12
GGGGAGGAGCCC	3988.56				GGGGAGGAGCCC	3988.56	12
GAUGAGUAGGGC	3974.53				GAUGAGUAGGGC	3974.53	12
GGGUGUGUAAGC	3951.5				GGGUGUGUAAGC	3951.5	12
GGAAGAUGUAAC	3942.54				GGAAGAUGUAAC	3942.54	12
UGUGAGGUAUGC	3912.48				UGUGAGGUAUGC	3912.48	12
YGGGUUUAGAAC	3896.49				YGGGUUUAGAAC	3896.49	12
GUAAUGAUGGCC	3895.5				GUAAUGAUGGCC	3895.5	12
GAAAAGAACCCC	3884.57				GAAAAGAACCCC	3884.57	12
UAUUUAGGUAGC	3857.46				UAUUUAGGUAGC	3857.46	12
GAAGGGGGGAC	3707.53				GAAGGGGGGAC	3707.53	11
GGGGGUAGAGC	3684.5				GGGGGUAGAGC	3684.5	11
GAAGGGAAACC	3635.53				GAAGGGAAACC	3635.53	11
AAGGGUAUGGC	3629.48				AAGGGUAUGGC	3629.48	11
AGGAUGUUGGC	3606.45				AGGAUGUUGGC	3606.45	11
UGUG[m6A]AGAUGC	3604.48				UGUG[m6A]AGAUGC	3604.48	11
GAGAUGAGUUC	3590.46				GAGAUGAGUUC	3590.46	11
UAAAGAGUAAC	3581.5				UAAAGAGUAAC	3581.5	11
GAUAGUGAACC	3573.48	isomer 1			GGAAAGACCCC	3571.51	11
AAAAUGGUGCC					GAGAUUCCCCC	3485.45	11
GGAAAGACCCC	3571.51				GGGAGAAGGC	3362.48	10
GGGUAAGUUCC	3566.45	isomer 2			UGAGGGGGGC	3355.45	10
GUUGAUAGGCC					GGGAGAUAGC	3323.46	10
GAGAUUCCCCC	3485.45				AGGAAAAGCC	3290.48	10
GGGAGAAGGC	3362.48				UUGAGAGAAC	3268.44	10
UGAGGGGGGC	3355.45				UGGAGGUAUC	3261.41	10
GGGAGAUAGC	3323.46				GGUGUUUGGC	3254.38	10
GAUGAAGGAC	3307.46	isomer 3			AAGGUUAACC	3228.43	10
GAUGGGAAAC					GUUAAGUUGC	3222.39	10
GAAAGUGGAC					UUGAGAGUCC	3221.4	10
AGGGUGAGUC	3300.43	isomer 4			AUAGUGAUCC	3205.41	10
GAAGGUUGGC					UAUGUUGGCC	3198.38	10
AGGAAAAGCC	3290.48				UUGAAAUACC	3189.41	10
UUGAGAGAAC	3268.44				UAAGUACCCC	3164.42	10
UGGAGGUAUC	3261.41				GGAGAAGGC	3017.43	9
GGUGUUUGGC	3254.38				G[m2G]GGADAAC	2994.44	9
AAGGUUAACC	3228.43				UGGAAAGGC	2978.41	9
GUUAAGUUGC	3222.39				GAGAGGACC	2977.43	9
UUGAGAGUCC	3221.4				GGUGGAUGC	2971.38	9
AUAGUGAUCC	3205.41				UGAAGGAAC	2962.41	9
AGUGUGUUUC	3199.36	isomer 5			UGGAGGACC	2954.4	9
UUGGUGUUAC					GAAGAUACC	2922.41	9
UAUGUUGGCC	3198.38				GGUUUAAGC	2916.36	9
UUGAAAUACC	3189.41				AAGGGUUCC	2915.38	9
UAAGUACCCC	3164.42				AUAAGUAAC	2907.4	9
GGAGAAGGC	3017.43				GUGGUAUCC	2892.35	9
G[m2G]GGADAAC	2994.44				UAAUGAACC	2883.39	9
AGUGGGAGC	2994.41	isomer 6			GGUUGUCCC	2868.34	9
AAGGGGGUC					GUUAUAACC	2860.36	9
GGAGUGGAC					UGGUUUUCC	2830.3	9
UGGAAAGGC	2978.41				AGGGUGAC	2649.36	8
GAGAGGACC	2977.43				[m6A]GGUGGUC	2640.35	8
GGUGGAUGC	2971.38				GGAAGACC	2632.38	8
UGAAGGAAC	2962.41				AUGGAGCC	2609.35	8
UGGAGGACC	2954.4				AAAAAUGC	2601.37	8
UAAGGUAGC	2939.39	isomer 7			UGGUGUUC	2564.28	8
GUUGAAGAC					AAAUGCCC	2553.35	8
GAAGAUACC	2922.41				GUUGACCC	2546.32	8
GGUUUAAGC	2916.36				UUAUAUUC	2493.27	8
AAGGGUUCC	2915.38				GGGAGAC	2343.33	7
AUAAGUAAC	2907.4				GAAAGGC	2327.34	7
GUGGUAUCC	2892.35				GGGUUGC	2297.28	7
UAAUGAACC	2883.39				GU[m7G]AACC	2278.32	7
UAAGGUCCC	2875.37	isomer 8			UUGUGGC	2258.26	7
AGUGUACCC					GAAACCC	2247.33	7
GGUUGUCCC	2868.34				UAAAUAC	2233.3	7
GUUAUAACC	2860.36				GUUAAUC	2226.27	7
UGGUUUUCC	2830.3				GAUUUCC	2202.26	7
GGGGGAAC	2688.38	isomer 9			GUACCCC	2200.29	7
GGAGGAGC					UUGCCCC	2177.26	7
AGGGUGAC	2649.36				[m3U]AYAAC	2051.23	6
[m6A]GGUGGUC	2640.35				UG[Gm]GGC	2005.27	6
AGAAGUGC	2633.36	isomer 10			AGAGGC	1998.29	6
UGGAGAAC					GAGGCC	1974.28	6
GGAAGACC	2632.38				AGAGCC	1958.28	6
GUGUAGGC	2626.33	isomer 11			GGUGCC	1951.25	6
GGUGUGAC					G[m2A]YGUC	1950.25	6
GAUAAAGC	2617.37	isomer 12			AGUACC	1919.26	6
GGAAAAUC					UGGUUC	1913.21	6
GGUUAAGC	2610.34	isomer 13			GGUCCC	1911.24	6
GUGAUGAC					AUUAAC	1904.25	6
AUGGAGCC	2609.35				UGUUUC	1874.19	6
GGUGGUUC	2603.3	isomer 14			GGUCC	1606.2	5
GGGUUGUC					AAAUC	1598.22	5
AAAAAUGC	2601.37				UAACC	1574.21	5
UUAGAAGC	2594.34	isomer 15			AACCC	1573.23	5
GUAAUAGC					UUGUC	1568.16	5
AAGAGUUC					UGUCC	1567.18	5
UGUAAGCC	2570.33	isomer 16			UGCCC	1566.19	5
AUUGAGCC					AC[Cm]UC	1564.21	5
GAAGCCCC	2568.36	isomer 17			UUUAC	1552.17	5
GAAA[m5U]UCC					UUACC	1551.18	5
UGGUGUUC	2564.28				AUCCC	1550.2	5
AAAUGCCC	2553.35				UCCCC	1526.19	5
GUUGACCC	2546.32					Total	1385
UUAUAUUC	2493.27					percentage	47.6928
GGGAGAC	2343.33
GAAAGGC	2327.34
GUGGAGC	2320.31	isomer 18
GUGAGGC
GGAUGAC	2304.31	isomer 19
GAAUGGC
GUGAGAC
GGGUUGC	2297.28
GAUAAGC	2288.32	isomer 20
AGGUAAC
GGUAAAC
UGAAAGC
UGUGAGC	2281.28	isomer 21
GUGUGAC
GGUGAUC
GUUGAGC
GU[m7G]AACC	2278.32
UUGUGGC	2258.26
UGAAAUC	2249.29	isomer 22
UAAAUGC
UGAAACC	2248.31	isomer 23
GAAUACC
AUAAGCC
GAAACCC	2247.33
UAAAUAC	2233.3
GUUAAUC	2226.27
UGAAUCC	2225.28	isomer 24
GUAAUCC
YGAUACC
GAUUUCC	2202.26
GUACCCC	2200.29
UUGCCCC	2177.26
[m3U]AYAAC	2051.23
UG[Gm]GGC	2005.27
AGAGGC	1998.29
GGGYGC	1991.25	isomer 25
UGGGGC
GUGGGC
GAAAGC	1982.29
GAAAGC		identical
AUGGGC	1975.26	isomer 26
UGAGGC
AGGUGC
GGUAGC
GAGGCC	1974.28
AGUAGC	1959.26	isomer 27
GUGAAC
GAAUGC
UAAGGC
UGAAGC
AAUGGC
AAUGGC		identical
AGAGCC	1958.28
GGUGCC	1951.25
G[m2A]YGUC	1950.25
UGAAAC	1943.27	isomer 28
AAAGUC
GUGUAC	1936.24	isomer 29
UUAGGC
UGUAGC
GUAGUC
AGUGUC
UGAAUC	1920.24	isomer 30
GUAUAC
UAUAGC
UAGUAC
AGUACC	1919.26
UGGUUC	1913.21
GGUCCC	1911.24
AUUAAC	1904.25
UAAACC	1903.26	isomer 31
AAAUCC
UUAUGC	1897.21	isomer 32
UUGAUC
AGCCCC	1894.26	isomer 33
GACCCC
UAAUCC	1880.24	isomer 34
UUAACC
UGUUUC	1874.19
GGGGC	1685.23
GGGGC		identical
GGGAC	1669.23
GAGGC	isomer 35
AAGGC	1653.24
GAAGC	isomer 36
AAGGC	isomer 36
AAGGC		identical
GAAGC	1653.24	isomer 37
GAGAC
UGGGC	1646.21	isomer 38
GGUGC
AAGAC	1637.24	isomer 39
GAAAC
GAGUC	1630.21	isomer 40
GAUGC
GAGUC
UAGGC
GUGAC
AGGUC
GAUGC
GGUAC
UAAGC	1614.22	isomer 41
GAUAC
UAAGC
GUAAC
GYAAC		identical
UGAAC
UAAGC
GAACC	1613.23	isomer 42
GAACC		identical
AGACC
UGGUC	1607.18	isomer 43
UGUGC
UGGUC		identical
GGUCC	1606.2
AAAUC	1598.22
AAACC	1597.24
AAACC		identical
UGUAC	1591.19	isomer 43
UUGAC
UUGAC		identical
AGUYC
UGACC	1590.21	isomer 44
GUACC
UAGCC
AUGCC
U[m2G]CCC	1580.21	isomer 45
[Um]GUUC
UAAUC	1575.19	isomer 46
UUAAC
AUAUC
UAACC	1574.21
AACCC	1573.23
AACCC		identical
UUGUC	1568.16
UGUCC	1567.18
UGCCC	1566.19
AC[Cm]UC	1564.21
UUUAC	1552.17
UUACC	1551.18
AUCCC	1550.2
UCCCC	1526.19

## Sheet: 23S-cusativin_missedcleavage
sequence	23S_Cus DP_mass_3'>P	MSMS	MS1
UGCGAAGGGGGGACp	1553.19
AAAUCCGGAAAAUCp	1505.53				Digestion products detected at each MS stage is shown as shaded
AAGACGGAAAGACCCCp	1734.9
AAGGGGGUCAUCCCGACp	1839.89
GUCGUGAAGAGGGAAACp	1869.24
AAUGGCAUAAGCCAGCp	1727.55
UGACCCUUUAAGGGUCCp	1806.21
ACGAAACp	1134.65
AAGCGAAGCp	1479.7
AGGCYGAUACCGCCCp	1601.86

## Sheet: 23S-MC1
23S_MC1 Digestion Product	Mass_3'>P	MSMS	MS1 only	Column1	Unique digestion products	Mass_3'>P2	nt	MSMS3	MS1 only4
UGAGGGAAAGGCGAAAAGAACCCCGGCGAGGGGAG	11605.6				UGAGGGAAAGGCGAAAAGAACCCCGGCGAGGGGAG	11605.6	35
UAGCGGCGAGCGAACGGGGAGGAGCCCAGAGCC	10859.5				UAGCGGCGAGCGAACGGGGAGGAGCCCAGAGCC	10859.5	33
UGAAGAGGGAAACAACCCAGACCGCCAGC	9431.34				UGAAGAGGGAAACAACCCAGACCGCCAGC	9431.34	29				Digestion products detected at each MS stage is shown as shaded
UACCCGCGGCAAGACGGAAAGACCCCG	8749.23				UACCCGCGGCAAGACGGAAAGACCCCG	8749.23	27
UAGGGGAGCCGAAGGGAAACCGAG	7954.12				UAGGGGAGCCGAAGGGAAACCGAG	7954.12	24
UGCGAAGGGGGGACGGAGAAGGC	7681.07				UGCGAAGGGGGGACGGAGAAGGC	7681.07	23
UGGGAAGGCCCAGACAGCCAGGA	7545.06				UGGGAAGGCCCAGACAGCCAGGA	7545.06	23
UCACGGGAGACACACGGCGGG	6886.95				UCACGGGAGACACACGGCGGG	6886.95	21
UAAGGCGAGGCCGAAAGGCG	6605.92				UAAGGCGAGGCCGAAAGGCG	6605.92	20
UAACGGAGGAGCACGAAGG	6284.89				UAACGGAGGAGCACGAAGG	6284.89	19
UGAGGCGAACCGGGGGAAC	6276.87				UGAGGCGAACCGGGGGAAC	6276.87	19
UACCCCAAACCGACAC[m6A]GG	6098.88				UACCCCAAACCGACAC[m6A]GG	6098.88	19
UCGCCGGAAGACCAAGGG	5891.82				UCGCCGGAAGACCAAGGG	5891.82	18
UACCCCGAGGAAAAGAAA	5867.85				UACCCCGAGGAAAAGAAA	5867.85	18
UGGAGGACCGAACCGAC	5546.77				UGGAGGACCGAACCGAC	5546.77	17
UACGAGAGGACCGGAG	5281.74				UACGAGAGGACCGGAG	5281.74	16
UGACGGCGCGAGCAGG	5273.72				UGACGGCGCGAGCAGG	5273.72	16
UCGGGAGAAGGCACGC	5257.73				UCGGGAGAAGGCACGC	5257.73	16
UAGACCCGAAACCCGG	5161.72				UAGACCCGAAACCCGG	5161.72	16
UGGAAAGGCGCGCGA	4952.69				UGGAAAGGCGCGCGA	4952.69	15
UAGCGCAAGCGAAGC	4896.68				UAGCGCAAGCGAAGC	4896.68	15
UAGGGCGGGACACG	4623.63				UAGGGCGGGACACG	4623.63	14
UGGCCGGGCGACGG	4615.62				UGGCCGGGCGACGG	4615.62	14
UGAAGACGACGACG	4591.64				UGAAGACGACGACG	4591.64	14
UGCAAACACGAAAG	4559.65				UGCAAACACGAAAG	4559.65	14
UGCGGCAGCGACGC	4559.62				UGCGGCAGCGACGC	4559.62	14
UAAAAACACAGCAC	4503.65				UAAAAACACAGCAC	4503.65	14
UGGGGAAACCCAG	4262.59				UGGGGAAACCCAG	4262.59	13
UCAAACCGGGAGA	4246.6				UCAAACCGGGAGA	4246.6	13
UAAACGGCGGCCG	4238.58				UAAACGGCGGCCG	4238.58	13
UCCAGGAAAAGCC	4206.59				UCCAGGAAAAGCC	4206.59	13
UACCGCCCAAGAG	4182.58				UACCGCCCAAGAG	4182.58	13
UCGGCAAGGGGG	3989.54				UCGGCAAGGGGG	3989.54	12
UGCGAAAGCAGG	3957.55				UGCGAAAGCAGG	3957.55	12
UAAGCGCAGCGA	3917.54				UAAGCGCAGCGA	3917.54	12
UGAAAAAGAACC	3909.57		isomer 1		UAGAAGCAGCCA	3901.55	12
UGAAGCAACAAA					UAAGCACGAAAC	3885.55	12
UAGAAGCAGCCA	3901.55				UGAAAAGCCCGC	3877.54	12
UAAGCACGAAAC	3885.55				UCGAAGCCCCGG	3869.52	12
UGAAAAGCCCGC	3877.54				UCCACCCGAGAC	3813.52	12
UCGAAGCCCCGG	3869.52				UCGGGGCAGGG	3660.49	11
UCCACCCGAGAC	3813.52				UGGGGGGACCA	3644.49	11
UCGGGGCAGGG	3660.49				UAAAGAAAGCG	3620.52	11
UGGGAAACAGG	3652.51		isomer 2		UGAAAGGCCAA	3596.51	11
UGCGGAAGAGA					UGACGAGGCAC	3588.49	11
UGGGGGGACCA	3644.49				UGGAGCCGACC	3564.48	11
UGCGCGGAAGA	3628.5		isomer 3		UGACAGCCCCG	3524.47	11
UGGAAGGGCCA					UCCCCGAAAGC	3508.48	11
UAAAGAAAGCG	3620.52				UACCAACCCGA	3492.49	11
UGAAAGGCCAA	3596.51				UGAGGGGGGC	3355.45	10
UGACGAGGCAC	3588.49				UAGGGGAGCG	3339.45	10
UGGAGCCGACC	3564.48				UGCCGGAAGG	3299.45	10
UGCACCGAAGC	3548.49		isomer 4		UCAGAGGCGA	3283.45	10
UACCAAGGCGC					UCGACGGCGG	3275.43	10
UGACAGCCCCG	3524.47				UACCGGAGAA	3267.46	10
UCCCCGAAAGC	3508.48				UGGACGCCAG	3259.44	10
UACCAACCCGA	3492.49				UAACCGGCGA	3243.45	10
UGAGGGGGGC	3355.45				UAGGCCGGG	2970.39	9
UAGGGGAGCG	3339.45				UAGGCAAAA	2946.42	9
UGGGAAACGA	3307.46		isomer 5		UGAAGCGAC	2938.4	9
UGAAGGAACG					UGGCCAGGC	2930.39	9
UGCCGGAAGG	3299.45				UAAGCCAGC	2898.4	9
UCAGAGGCGA	3283.45				UCGACACAC	2858.39	9
UCGACGGCGG	3275.43				UG[Gm]GGCGG	2695.36	8
UACCGGAGAA	3267.46				UCCGGGGG	2641.34	8
UGGACGCCAG	3259.44				UCCG[m2G]GGA	2639.36	8
UAACCGGCGA	3243.45				UGCGAGCG	2625.35	8
UCAACCGAGA	3227.45		isomer 6		UGAAAGCA	2617.37	8
UCCAGGCAAA					Y[m5U]GAAAAA	2616.37	8
UACACAAAAA	3219.47		isomer 7		UGGACGCA	2609.35	8
UGCCCCGAGA					DAACAGGC	2595.37	8
UGAAGGACG	2978.41		isomer 8		UAACCGAA	2577.36	8
UAAAGCGGG					UCCCAAAG	2553.35	8
UAGGCCGGG	2970.39				UCCCCCAG	2505.33	8
UGAGAGAAC	2962.41		isomer 9		UCGACCCC	2505.33	8
UGAAGGAAC					UACCACCC	2489.33	8
UAACGGGGC	2954.4		isomer 10		UGGGCGC	2296.3	7
UGCGGACAG					UGAAACA	2272.32	7
UAGGCAAAA	2946.42				U[m2G]CCCGG	2270.3	7
UGAAGCGAC	2938.4				UGCCCGG	2256.29	7
UGGCCAGGC	2930.39				UGGCA[Cm]C	2254.31	7
UACAAGCAG	2922.41		isomer 11		UGCAAAC	2248.31	7
UCCGGAAAA					UAAACCA	2232.32	7
UCCCAAGGG	2914.39		isomer 12		UCCGAC[m5C]	2214.3	7
UACGCGAGC					UCCCGAC	2200.29	7
UAAGCCAGC	2898.4				YAAC[m3U]A	2051.23	6
UCGACACAC	2858.39				UGGGGG	2031.26	6
UG[Gm]GGCGG	2695.36				UGGAGG	2015.27	6
UGGGCAGG	2665.35		isomer 13		UG[m6A]AGA	1997.29	6
UGGGAGGC					UGGC[Um]G	1966.25	6
UGGAAGCG	2649.36		isomer 14		CGAAA[m5U]	1957.29	6
UGGGAGCA					UCCGGG	1951.25	6
UCAGGAGG					U[m7G]AACC	1932.27	6
UCCGGGGG	2641.34				UAACAC	1903.26	6
UCCG[m2G]GGA	2639.36				UCGCCA	1895.25	6
UAGCAAGG	2633.36		isomer 15		UGGGG	1686.21	5
UGAGACAG					UGAGG	1670.22	5
UGGAGAAC							1154
UGCGAGCG	2625.35						39.7383
UGAAAGCA	2617.37
Y[m5U]GAAAAA	2616.37
UGGACGCA	2609.35
DAACAGGC	2595.37
UAAGCGAC	2593.36		isomer 16
UGAACCAG
UGAAACCG
UAGAGCAC
UGCACGAA
UCAACGGA
UAACCGAA	2577.36
UCCAAGGC	2569.35		isomer 17
UCAGCGAC
UCCCAAAG	2553.35
UCCCCCAG	2505.33
UCGACCCC	2505.33
UACCACCC	2489.33
UGCAGGG	2320.31		isomer 18
UGAGGCG
UAGAGAA	2312.33		isomer 19
UAAAGAG
UAAAAGG
UACAGGG	2304.31		isomer 20
UAGCGGA
UGGGCGC	2296.3
UCAGAAG	2288.32		isomer 21
UCGAAGA
UAGAACG
UGAAACA	2272.32
U[m2G]CCCGG	2270.3
UACACGG	2264.3		isomer 22
UGAACCG
UGACCGA
UCAAGGC
UCGGACA
UAACCGG
UGAACCG
UGCCCGG	2256.29
UGGCA[Cm]C	2254.31
UGCAAAC	2248.31
UAGCGCC	2240.29		isomer 23
UGACGCC
UGACCCG
UAAACCA	2232.32
UCCAACG	2224.3		isomer 24
UACCAGC
UCCGAC[m5C]	2214.3
UCCCGAC	2200.29
YAAC[m3U]A	2051.23
UGGGGG	2031.26
UGGAGG	2015.27
UGAAGG	1999.27		isomer 25
UGAAGG
UGAGAG
UG[m6A]AGA	1997.29
UGGGCG	1991.25		isomer 26
UGGGGC
UGGCAG	1975.26		isomer 27
UAGGCG
UGGAGC
UGGACG
UGAGGC
UGGC[Um]G	1966.25
UAAGCG	1959.26		isomer 28
UAAGCG
UGCGAA
UGCGAA
UAAGCG
YAACGG
CGAAA[m5U]	1957.29
UCCGGG	1951.25
UAACGA	1943.27		isomer 29
UAAGCA
UGAACA
UGAGCC	1935.25		isomer 30
UGGCAC
U[m7G]AACC	1932.27
UCCGAA	1919.26		isomer 31
UGCACA
UAGCCA
UAAGCC
UGCAAC
UGACAC
UGCCAA
UCGGCC	1911.24		isomer 32
UCCCGG
UAACAC	1903.26
UCGCCA	1895.25
UGGGG	1686.21
UGAGG	1670.22
UAAGG	1654.22		isomer 33
UAAGG
UAAGG
UAGGA
UGAAG
UGAAG
UCGGG	1646.21		isomer 34
UCGGG
UGGCG
UCGGG
UGAAA	1638.23		isomer 35
UGAAA
UGAAA
UAAAG
UGCGA	1630.21		isomer 36
UGAGC
UCGAG
UAGGC
UACGG
UCAGG
UCAGG
UACGG
UGCAG
UGGCA
UGAGC
UGAAC	1614.22		isomer 37
UAACG
UGACA
UGAAC
UAACG
UGCAA
UGCCG	1606.2		isomer 38
UCCGG
UCGGC
UGCCG
UAACA	1598.22		isomer 39
UCAAA
UACCG	1590.21
UCACA	1574.34		isomer 40
UAACC
UGCCC	1566.19
UGCCC			identical

## Sheet: 23S-MC1_missedcleavage
sequence	23S_Cus DP_mass_3'>P	MSMS	MS1
UGAACCGUp	1284.15
UGGUGGGUAGUp	1206.46
UGCCCGGUAGCp	1179.14
UCAGUCGAAGAp	1190.15				Digestion products detected at each MS stage is shown as shaded
UGAAGGACGUGCp	1310.16
UGGGAAACAGGUp	1318.16
UUGUCGGGUAAGUp	1404.82
UCAGAAGUGCGAAp	1414.51
UGGCCGGGCGACGGUp	1639.19
UCGGGUGAAGGAACp	1534.86
UAGUGAUCCGGUGGUp	1621.52
UUCCAGGAAAAGCCp	1503.19
UCCGGUGGUUCUGAAp	1608.18
UAAGUGGGAAACGAp	1537.53
UGGCAUAAGCCAGCp	1508.19
UAACGUUGACCCGUAAp	1706.87
UCCGGAAAAUCAAGGCp	1727.55
UAAGGUCCCAAAGUCAp	1714.55
UAAGUGCUGAAAGCAUCp	1829.89
UAAGCGUCGGUAAGGUGAp	1963.57
UGACCCUUUAAGGGUCCp	1806.21
UGUAGGUGAGGUCCCUCGCGGAp	1785.71
UAAGGGUCCp	1456.67
UGCCGUGGGCGCp	1299.48
UCCUGUCCAACGUp	1364.49
UGGCAGUCAGAGGCGAp	1751.55
U[m2G]CCCGGUGCCGGAAGGUp	1957.24
UAAAGAAAGCGUAAp	1526.86

## Sheet: sequence
Domain I	GGUUAAGCGA CUAAGCGUAC ACGGUGGAUG CCCUGGCAGU CAGAGGCGAU
(541 nt)	GAAGGACGUG CUAAUCUGCG AUAAGCGUCG GUAAGGUGAU AUGAACCGUU
	AUAACCGGCG AUUUCCGAAU GGGGAAACCC AGUGUGUUUC GACACACUAU
	CAUUAACUGA AUCCAUAGGU UAAUGAGGCG AACCGGGGGA ACUGAAACAU
	CUAAGUACCC CGAGGAAAAG AAAUCAACCG AGAUUCCCCC AGUAGCGGCG
	AGCGAACGGG GAGCAGCCCA GAGCCUGAAU CAGUGUGUGU GUUAGUGGAA
	GCGUCUGGAA AGGCGCGCGA UACAGGGUGA CAGCCCCGUA CACAAAAAUG
	CACAUGCUGU GAGCUCGAUG AGUAGGGCGG GACACGUGGU AUCCUGUCUG
	AAUAUGGGGG GACCAUCCUC CAAGGCUAAA UACUCCUGAC UGACCGAUAG
	UGAACCAGUA CCGUGAGGGA AAGGCGAAAA GAACCCCGGC GAGGGGAGUG
	AAAAAGAACC UGAAACCGUG UACGUACAAG CAGUGGGAGC A
Domain II	CGCUUAGGC GUGUGACUGC GUACCUUUUG UAUAAUGGGU CAGCGACUUA UAUUCUGUAG
(739 nt)	CAAGGUUAAC CGAAUAGGGG AGCCGAAGGG AAACCGAGUC UUAACUGGGC
	GUUAAGUUGC AGGGUAUAGA CCCGAAACCC GGUGAUCUAG CCAUGGGCAG
	GUUGAAGGUU GGGUAACACU AACUGGAGGA CCGAACCGAC UAAU[m1G][Ψ][m5U]GAA
	AAAUUAGCGG AUGACUUGUG GCUGGGGGUG AAAGGCCAAU CAAACCGGGA
	GAUAGCUGGU UCUCCCCGAA AGCUAUUUAG GUAGCGCCUC GUGAAUUCAU
	CUCCGGGGGU AGAGCACUGU UUCGGCAAGG GGGUCAUCCC GACUUACCAA
	CCCGAUGCAA ACUGCGAAUA CCGGAGAAUG UUAUCACGGG AGACACACGG
	CGGG[Ψ]GCUAA CGUCCGUCGU GAAGAGGGAA ACAACCCAGA CCGCCAGCUA
	AGGUCCCAAA GUCAUGGUUA AGUGGGAAAC GAUGUGGGAA GGCCCAGACA
	GCCAGGAUGU UGGCUUAGAA GCAGCCAUCA UUUAAAGAAA GCGUAAUAGC
	UCACUGGUCG AGUCGGCCUG CGCGGAAGAU GUAACGGGGC UAAACCAUGC
	ACCGAAGCUG CGGCAGCGAC GCUUAUGCGU UGUUGGGUAG GGGAGCGUUC
	UGUAAGCCUG CGAAGGUGUG CUGUGAGGCA UGCUGGAGGU AUCAGAAGUG
	CGAAUGCUGA CAUAAGUAAC GAUAAAGCGG
Domain III	GUGAAAAGCC CGCUCGCCGG AAGACCAAGG GUUCCUGUCC AACGUUAAUC GGGGCAGGGU GAGUCGACCC
(376 nt)	CUAAGGCGAG GCCGAAAGGC GUAGUCGAUG GGAAACAGGU UAAUAUUCCU
	GUACUUGGUG UUACUGCGAA GGGGGGACGG AGAAGGCUAU GUUGGCCGGG
	CGACGGUUGU CCCGGUUUAA GCGUGUAGGC UGGUUUUCCA GGCAAAUCCG
	GAAAAUCAAG GCUGAGGCGU GAUGACGAGG CACUACGGUG CUGAAGCAAC
	AAAUGCCCUG CUUCCAGGAA AAGCCUCUAA GCAUCAGGUA ACAUCAAAUC
	GUACCCCAAA CCGACAC[m6A]GG UGGUCAGGUA GAGAAUACCA AGGCGCUUGA GAGAAC
Domain IV	UCGG GUGAAGGAAC UAGGCAAAAU GGUGCCGUAA CUUCGGGAGA
(371 nt)	AGGCACGCUG AUAUGUAGGU GAGGUCCCUC GCGGAUGGAG CUGAAAUCAG
	UCGAAGAUAC CAGCUGGCUG CAACUGUUUA UUAAAAACAC AGCACUGUGC
	AAACACGAAA GUGGACGUAU ACGGUGUGAC GCCU[m2G]CCCGG UGCCGGAAGG
	UUAAUUGAUG GGGUUAGCGC AAGCGAAGCU CUUGAUCGAA GCCCCGGUAA
	ACGGCGGCCG [Ψ]AAC[m3Ψ]A[Ψ]AAC GGUCCUAAGG UAGCGAAA[m5U]U CCUUGUCGGG
	UAAGUUCCGA C[m5C]UGCACGAA UGGCGUAAUG AUGGCCAGGC UGUCUCCACC
	CGAGACUCAG UGAAAUUGAA CUCGCUG
Domain V	UG[m6A] AGAUGCAGUG UACCCGCGGC
(608 nt)	AAGACGGAAA GACCCCGU[m7G]A ACCUUUACUA UAGCUUGACA CUGAACAUUG
	AGCCUUGAUG UGUAGGAUAG GUGGGAGGCU UUGAAGUGUG GACGCCAGUC
	UGCAUGGAGC CGACCUUGAA AUACCACCCU UUAAUGUUUG AUGUUCUAAC
	GUUGACCCGU AAUCCGGGUU GCGGACAGUG UCUGGUGGGU AGUUUGACUG
	[Gm]GGCGGUCUC CUCCUAAAGA GUAACGGAGG AGCACGAAGG UUGGCUAAUC
	CUGGUCGGAC AUCAGGAGGU UAGUGCAAUG GCAUAAGCCA GCUUGACUGC
	GAGCGUGACG GCGCGAGCAG GUGCGAAAGC AGGUCAUAGU GAUCCGGUGG
	UUCUGAAUGG AAGGGCCAUC GCUCAACGGA UAAAAGGUAC UCCG[m2G]GGA[D]A
	ACAGGCΨGAU ACCGCCCAAG AGUUCAUAUC GACGGCGGUG UUUGGCAC[Cm]U
	CG[m2A]ΨGUCGGC UCAUCACAUC CUGGGGCUGA AGUAGGUCCC AAGGGUAUGG
	C[Um]GUUCGCCA UUUAAAGUGG UACGCGAGCΨ GGGUUUAGAA CGUCGUGAGA
	CAGΨΨCGGUC CCUAUCUGCC GUGGGCGCUG GAGAA
Domain VI	CUGAG GGGGGCUGCU CCUAGUACGA GAGGACCGGA GUGGACGCAU CACUGGUGUU
(269 nt)	CGGGUUGUCA UGCCAAUGGC ACUGCCCGGU AGCUAAAUGC GGAAGAGAUA
	AGUGCUGAAA GCAUCUAAGC ACGAAACUUG CCCCGAGAUG AGUUCUCCCU
	GACCCUUUAA GGGUCCUGAA GGAACGUUGA AGACGACGAC GUUGAUAGGC
	CGGGUGUGUA AGCGCAGCGA UGCGUUGAGC UAACCGGUAC UAAUGAACCG
	UGAGGCUUAA CCUU
