# Supplementary material for: Improved RNA modification mapping of cellular non-coding RNAs using C- and U-specific RNases
Source: Royal Society of Chemistry journal article supplement (doi:10.1039/c9an02111f), 2019-12-02
Supplement: c9an02111f2.xlsx [file c9an02111f2.xlsx]

## Sheet: Cusativin UDPs
tRNA	tRNA isoacceptors	# Expected unique digestion products (UDPs)	Expected UDPs of isodecoders (Dtected UDPs are in bold)	# of UDPs shared by the isoacceptor families	Expected UDPs from isoacceptor families (Detected UDPs are in bold)
Ala	Ala([cmo5U]GC)	3	UU[cmo5U]GC, AGGAG[m7G]UC, AUAGC	3	GGGGC, UAUAGC, DGGGAGAGC
	Ala(GGC)	2	AUGGC, AAGAG[m7G]UC
Arg	Arg([I]CG)	4	DGGADAGAGUAC, G[m2A]ACC, G[m7G][acp3U]C, GGAUGC
	Arg (CCG)	4	GUAGC, DGGADAGAGC, G[m1G]AGGC, AGAG[m7G]UC,
	Arg([mnm5U]CU)	4	AGUUGGAUAGAGC, GUGGGCC, AGG[m5U]PC, AGGGC
Asn	Asn([Q]UU)	5	UG[s4U]AGUUC, GGDAGAAC, UQUU[t6A]AYCC, GUAU[m7G]UC, AGAGGAGCC
Asp	Asp([gluQ]UC)	7	pGGAGC, GG[s4U]AGUUC, GGDDAGAAUACC, U[gluQ]UC, AGGGG[m7G]UC, GAGUCCC, GUUCC
Cys	Cys(GCA)	7	GU[s4U]AAC, AAAGC, GGDDAUGUAGC, GGAYUGC, A[ms2i6A]AYCC, UAGUCC, GGAAC
Gln	Gln([cmnm5s2U]UG)	3	GGU[Um]U[cmnm5s2U]UG[m2A]YACC, AUUCCC, AGGUACCCC	2	UGGGGUA[s4U]C, [Gm]GDAAGGC
	Gln(CUG)	5	GGA[Um]UC, UG[m2A]YYCC, AUUCC, GAGG[m5U]YC, GUACCCC
Glu	Glu([mnm5s2U]UC)	1	U[mnm5s2U]UC,	6	GUCCCC, YAGAGGCCC, AGGAC, GGUAAC, AGGGG[m5U]YC, UAGGGGAC
	Glu([mnm5U]UC)	2	U[mnm5U]UC, U[s4U]C
Gly	Gly(CCC)	5	AAUGGDAGAAC, GAGAGC, UUCCC, UAUAC, GAGGG[m5U]YC	1	GAUUCCC
	Gly([mnm5U]CC)	5	GUAUAAUGGC, UAUUACC, U[mnm5U]CC, UGAUGAUGC, UGCCC
	Gly(GCC)	3	GGGAAUAGC, GGG[m7G]UC, GUUUCCC
His	His([Q]UG)	6	GGUGGC, UA[s4U]AGC, AGDDGGDAGAGCCC, UGGAUUQUG[m2A]YYCC, AGUU[m7G]UC, GUGGG[m5U]YC
Ile	Ile(GAU)	4	UUGUAGC, AGGDGGDDAGAGC, UGAU[t6A]AGGGUGAG[m7G][acp3U]C, AGGCC
	Ile([k2C]AU)	3	AGU[Gm]GDDAGAGC, U[k2C]AU[t6A]AYC, AGGGGCC
Leu	Leu(CAG)	5	GAAGGUGGC, GGAADD[Gm]GDAGAC, AG[m1G]YGYUAGUGUCC, GUGGGGG[m5U]YC, AAGUCCCCCCCC
	Leu(GAG)	3	GAGGUGGUGGAADD[Gm]GDAGAC, UUGAG[m1G]YGGUAGUGCCC, AAUAGGGC	1	AAGUCCC
	Leu([cmnm5Um]AA)	4	GGA[s4U]GGUGGAADC, AAGGGAYU[cmnm5Um]AA[ms2i6A]AYCCC, GGGUACC, UGUGC
	Leu([Cm]AA)	5	GAAG[s4U]GGC, GAAADC, AGUUGAYU[Cm]AA[ms2i6A]AYC, GUAGAAAUAC, [Gm]GDAGAC
	Leu([cmo5U]AG)	5	GGGAGUGGC, GAAADD[Gm]GUAGAC, AGAUU[cmo5U]AG[m1G]YUC, AAGGUGUGC, AAGUC
Lys	Lys([mnm5s2U]UU)	5	pGGGUC, GUUAGC, AGUUGAC, U[mnm5s2U]UU[t6A]AYC, AAUUG[m7G][acp3U]C
Met	Met([ac4C]AU)	3	AGDD[Gm]GDDAGAGC, U[ac4C]AU[t6A]AUAAYGAUGGG[m7G][acp3U]C, GUAGCC
Phe	Phe(GAA)	3	AGGGGAYUGAA[ms2i6A]AYCCCC, GU[m7G][acp3U]CC, UUGG[m5U]YC
Pro	Pro(CGG)	2	GG[m1G]AC, GAAGGG[m7G]UC
Sec	Sec(UCA)	8	pAAGAUC, G[s4U]C, GGDGAGGC, UGGAC, A[i6A]AUCC, AGUUGGGGCC, GGUCCC,UGUGAUC
Ser	Ser([cmo5U]GA)	5	GGAAGUG[s4U]GGCC, [Gm]GDDGAAGGC, GGU[Cm]U[cmo5U]GA[ms2i6A]AACC, GAAAGGGUUCC, AGAG[m5U]YC
	Ser(CGA)	8	GGAGAGAUGCC, GGAGC, [Gm]GC, DGAAC, GGACC, GA[ms2i6A]AACC, GGAGUAGGGGC, AAAUCCCCC
	Ser(GCU)	5	GGUGAGG[s4U]GGC, GAGAGGC, DGAAGGC, UAAGGGAGUAUGC, AAAAGC	1	GGGG[m5U]YC
	Ser(GGA)	5	GGUGAGG[s4U]GUCC, GAGU[Gm]GDDGAAGGAGC, UGGAAAGYGUGUAUAC, GUAUC, GAAUCCCCCCC
Thr	Thr(GGU)	3	UGAUAUGGC, UUGGU[m6t6A]AGGGUGAG[m7G]UCCCC, UGGGUAUC	1	AG[m5U]YC
	Thr(GGU)	2	UGAUAUAGC, UUGGU[m6t6A]AGGGUGAG[m7G]UC
	Thr([cmo5U]GU)	4	AGUAGGDDAGAGC, UGA[Cm]U[cmo5U]GU[t6A]AUC, AGUAG[m7G]UC, GGUAGUC
Trp	Trp(CCA)	6	AGGGGC, AADDGGDAGAGC, GGU[Cm]UCC, A[ms2i6A]AACC, GGGU[m7G]UUGGGAG[m5U]YC, GCCCC
Tyr	Tyr(QUA)	5	GGUGGGG[s4U][s4U]CCC, AAAGGGAGC, UQUA[ms2i6A]AYC, GAAGG[m5U]YC, UUCCCCC
Val	Val([cmo5U]AC)	3	GGGUGAU[s4U]AGC, U[cmo5U]AC, [m6A]AGGAGGGG[m7G]UC
	Val(GAC)	1	GGUGG[m5U]YC	2	AUGGUGGGG[m7G][acp3U]C, AGDDGGDDAGAGC
	Val(GAC)	3	A[s4U]AGC, GGUUGG[m5U]YC, AAUUGAAC
Ini	Ini(CAU)	1	GAAG[m7G]UC	4	GGGG[s4U]GGAGC, GGG[Cm]UC, AUAACCC, GGCCCCC
	Ini(CAU)	1	GAAGAUC
		168

## Sheet: MC1-UDPs
tRNA	tRNA isoacceptors	# expected unique digestion products (UDPs)	Expected UDPs of isodecoders (Detected UDPs are in bold)	# of UDPs shared by the isoacceptor families	Expected UDPs from isoacceptor families (Detected UDPs are in bold)
Ala	Ala([cmo5U]GC)	4	U[cmo5U]GCACGCAGGAG[m7G], UGCGG[m5U], UCCCGCA, DGGGAGAGCGCC	2	GGGGC, UCCACCA
	Ala(GGC)	4	UGGCA, UGCAAGAG[m7G], UCAGCGG[m5U], DGGGAGAGCGC
Arg	Arg([I]CG)	5	DAGAG, UCGG[s2C], UICG[m2A]ACCGAGCG[m7G][acp3U]CGGAGG[m5U], UCCCGGA, UGCACCA
	Arg (CCG)	6	GCGCCCG, DAGAGCGC, UGCC[s2C], UCCG[m1G]AGGCAGAG[m7G], UCAGG[m5U], UCGGGCGCGCCA
	Arg([mnm5U]CU)	6	GCGCCC, UAGAGCAACGAC[s2C], U[mnm5U]C, U[t6A]AG, UGGGCCGCAGG[m5U], UGCAGGGCGCGCCA
Asn	Asn([Q]UU)	3	UG[s4U]AG, DAGAACGGCGGAC, UCAGAGGAGCCA
Asp	Asp([gluQ]UC)	5	GGAGCGG[s4U]AG, DAGAA, U[gluQ], UC[m2A]CGCAGGGG[m7G], UCGCGGG[m5U]
Cys	Cys(GCA)	6	GGCGCG, U[s4U]AACAAAGCGG, UAGCGGA, UGCA[ms2i6A]A, UCCGG[m5U], UCCGGAACGCGCC
Gln	Gln([cmnm5s2U]UG)	4	DAAGGCACCGG, [Um]U[cmnm5s2U], YACCGGCA, UCCAGG	1	UA[s4U]CGCCAAGC[Gm]G, UACCCCAGCCA
	Gln(CUG)	3	DAAGGCACCGGA[Um]UC, YCCGGCA, UCCGAGG[m5U]
Glu	Glu([mnm5s2U]UC)	1	U[mnm5s2U]UC[m2A]CGGCGG,	3	UAGGGGACGCCA, UCCCC, YAGAGGCCCAGGACACCGCCC, UAACAGGGG[m5U],
Glu	Glu([mnm5U]UC)	2	U[s4U]CG,U[mnm5U]UC[m2A]CGGCGG,
Gly	Gly(CCC)	5	GCGGGCG[s4U]AG, DAGAACGAGAGC, UCCCAAGC, UACGAGGG[m5U], UCGCCCGC
	Gly([mnm5U]CC)	3	GCGGGCA, U[mnm5U]CCAAGC, UGCCCGC
	Gly(GCC)	5	GCGGGAA, DAGAGCACGACC, UGCCAAGG, UCGGG[m7G], UCGCGAG[m5U]
His	His([Q]UG)	5	UA[s4U]AGC, DAGAGCCC, YCCAGUU[m7G], UGGG[m5U], UAGCCACCCCA
Ile	Ile(GAU)	4	DAGAGCGCACCCC, U[t6A]AGGG, UGAG[m7G][acp3U]CGG, YCAGGCC
	Ile([k2C]AU)	6	GGCCCC, DAGAGCAGGCGAC, U[k2C]A, U[t6A]AYCGC, UG[m7G][acp3U]CGC, UCCAGCAGGGGCCACCA
Leu	Leu(CAG)	8	pGCGAAGG, UGGCGGAA, DAGACGCGC, UCAG[m1G]YGY, UACGGACG, UGGGGG[m5U], UCCCCCCCC, UCGCACCA
	Leu(GAG)	6	GCCGAGG, DAGACACGC, UGAG[m1G], UGCCCAA, UAGGGC, UACGGG[m5U]
	Leu([cmnm5Um]AA)	6	GCCCGGA[s4U]GG, DAGACACAAGGGA, U[cmnm5Um]AA[ms2i6A]A, YCCC, UCGGCG, UCGCGC, UCCGGG	0	DC[Gm]G
	Leu([Cm]AA)	6	GCCGAAG[s4U]GGCGAAA, DAGACGCAG, U[Cm]AA[ms2i6A]A, YCAACCG, UGCCGG[m5U], UCCGGCC
	Leu([cmo5U]AG)	8	GCGGGAG, UGGCGAAA, UAGACGCACCAGA, U[cmo5U]AG[m1G], UGGCGCCGCAAGG UGCGAG[m5U], UCGCC, UCCCGCACCA
Lys	Lys([mnm5s2U]UU)	3	DAGAGCAG, UG[m7G][acp3U]CGCAGG[m5U], UGCACGACCCACCA
Met	Met([ac4C]AU)	5	UACG[s4U]AGC, DAGAGCACA, U[ac4C]A, UGGG[m7G][acp3U]CACAGG[m5U], UAGCCACCA
Phe	Phe(GAA)	6	pGCCCGGA[s4U]AGC, DAGAGCAGGGGA, UGAA[ms2i6A]A, YCCCCG, U[m7G][acp3U]CC, UCCGGGCACCA
Pro	Pro(CGG)	5	UGGCGCAGCC, DAGCGCAC, UCGG[m1G]ACGAAGGG[m7G], UCGGAGG[m5U], UCACCGACCA
Sec	Sec(UCA)	6	UCG[s4U]CG, DGAGGCGGC, UGGAC, UCA[i6A]A, UGGGGCCGCGCGG, UCCCGGGCAGG[m5U]
Ser	Ser([cmo5U]GA)	6	GGAAG, UG[s4U]GGCCGAGC[Gm]G, DGAAGGCACCGG, U[Cm]U[cmo5U]GA[ms2i6A]AACCGGCGACCCGAAAGGGU, UCCAGAG[m5U], UGCGC
	Ser(CGA)	7	GGAGAGA, UGCCGGAGC[Gm]GC, DGAACGGACCGG, UCGA[ms2i6A]AACCGGAG, UAGGGGCAAC, UACCGGGGG[m5U], UCCCCC
	Ser(GCU)	7	UGAGG[s4U]GGCCGAGAGGC, DGAAGGCGC, UCCC[s2C], U[t6A]AGGGAG, UGCGG, UCAAAAGC, UCCGGGG[m5U], UCCCCGCC	1	UCACCGCCA
	Ser(GGA)	6	UGAGG[s4U]G, DGAAGGAGCACGCC, UGGAAAG, UACGGCAACG, UCGGGGG[m5U], UCCCCCCC
Thr	Thr(GGU)	1	UCCCCAG[m5U]	1	DAGAGCGCACCC, U[m6t6A]AGGG, UGAG[m7G], UCAGCACCA
	Thr(GGU)	1	UCGGCAG[m5U]
	Thr([cmo5U]GU)	6	GCCGAC, DAGAGCAAC, UGA[Cm]U[cmo5U]G, U[t6A]A, UAG[m7G], UCACCAG[m5U]
Trp	Trp(CCA)	5	AGGGGCG[s4U]AG, DAGAGCACCGG, UCCA[ms2i6A]AACCGGGU[m7G], UGGGAG[m5U], UCCGCCCC
Tyr	Tyr(QUA)	5	UGGGG[s4U][s4U]CCCGAGC[Gm]GCCAAAGGGAGCAGAC, UA[ms2i6A]A, UGCCG, UCGAAGG[m5U], UCCCCCACCACCA
Val	Val([cmo5U]AC)	4	DGGGAGAGCACC, U[cmo5U]AC[m6A]AGGAGGGG[m7G], UCGGCGG[m5U], UCACCCACCA
	Val(GAC)	2	UGGGG[m7G][acp3U]CGG, UCGGACGCACCA	1	DAGAGCACCACC, UGACA, UCCAA
	Val(GAC)	3	UCA[s4U]AGC, UGGGG[m7G][acp3U]CG, UGAACGCACCA
Ini	Ini(CAU)	1	UAACCCGAAG[m7G]	4	CGCGGGG[s4U]GGAGCAGCC, UCGGG[Cm]UCA, UCGG[m5U], UCCGGCCCCCGCAACCA
	Ini(CAU)	1	UAACCCGAAGA
		191
		(90/191)
		47.1204
